# Supplementary material
Source: ML conference proceedings conference paper supplement (https://proceedings.mlr.press/v32/hsieha14.html)
Supplement: Supplementary file [file hsieha14-supp.pdf]

## 8. Appendix

### 8.1. Proof of Lemma 1

*Proof.* When using  $\bar{K}$  defined in (3), the matrix  $Q$  in (1) becomes  $\bar{Q}$  as given below:

$$\bar{Q}_{i,j} = \begin{cases} y_i y_j K(\mathbf{x}_i, \mathbf{x}_j) & \text{if } \pi(\mathbf{x}_i) = \pi(\mathbf{x}_j) \\ 0 & \text{if } \pi(\mathbf{x}_i) \neq \pi(\mathbf{x}_j). \end{cases} \quad (7)$$

Therefore, the quadratic term in (1) can be decomposed into

$$\boldsymbol{\alpha}^T \bar{Q} \boldsymbol{\alpha} = \sum_{c=1}^k \boldsymbol{\alpha}_{(c)}^T Q_{(c,c)} \boldsymbol{\alpha}_{(c)}.$$

The constraints and linear term in (1) are also decomposable, so the subproblems are independent, and concatenation of their optimal solutions,  $\bar{\boldsymbol{\alpha}}$ , is the optimal solution for (1) when  $\bar{K}$  is replaced by  $\bar{K}$ .  $\square$

### 8.2. Proof of Theorem 1

*Proof.* We use  $\bar{f}(\boldsymbol{\alpha})$  to denote the objective function of (1) with kernel  $\bar{K}$ . By Lemma 1,  $\bar{\boldsymbol{\alpha}}$  is the minimizer of (1) with  $K$  replaced by  $\bar{K}$ , thus  $\bar{f}(\bar{\boldsymbol{\alpha}}) \leq \bar{f}(\boldsymbol{\alpha}^*)$ . By the definition of  $\bar{f}(\boldsymbol{\alpha}^*)$  we can easily show

$$\bar{f}(\boldsymbol{\alpha}^*) = f(\boldsymbol{\alpha}^*) - \frac{1}{2} \sum_{i,j:\pi(\mathbf{x}_i) \neq \pi(\mathbf{x}_j)} \alpha_i^* \alpha_j^* y_i y_j K(\mathbf{x}_i, \mathbf{x}_j) \quad (8)$$

Similarly, we have

$$\bar{f}(\bar{\boldsymbol{\alpha}}) = f(\bar{\boldsymbol{\alpha}}) - \frac{1}{2} \sum_{i,j:\pi(\mathbf{x}_i) \neq \pi(\mathbf{x}_j)} \bar{\alpha}_i \bar{\alpha}_j y_i y_j K(\mathbf{x}_i, \mathbf{x}_j). \quad (9)$$

Combining with  $\bar{f}(\bar{\boldsymbol{\alpha}}) \leq \bar{f}(\boldsymbol{\alpha}^*)$  we have

$$\begin{aligned} f(\bar{\boldsymbol{\alpha}}) &\leq \bar{f}(\boldsymbol{\alpha}^*) + \frac{1}{2} \sum_{i,j:\pi(\mathbf{x}_i) \neq \pi(\mathbf{x}_j)} \bar{\alpha}_i \bar{\alpha}_j y_i y_j K(\mathbf{x}_i, \mathbf{x}_j), \\ &= f(\boldsymbol{\alpha}^*) + \frac{1}{2} \sum_{i,j:\pi(\mathbf{x}_i) \neq \pi(\mathbf{x}_j)} (\bar{\alpha}_i \bar{\alpha}_j - \alpha_i^* \alpha_j^*) y_i y_j K(\mathbf{x}_i, \mathbf{x}_j) \\ &\leq f(\boldsymbol{\alpha}^*) + \frac{1}{2} C^2 D(\pi), \text{ since } 0 \leq \bar{\alpha}_i, \alpha_i^* \leq C \text{ for all } i. \end{aligned} \quad (10)$$

Also, since  $\boldsymbol{\alpha}^*$  is the optimal solution of (1) and  $\bar{\boldsymbol{\alpha}}$  is a feasible solution,  $f(\boldsymbol{\alpha}^*) < f(\bar{\boldsymbol{\alpha}})$ , thus proving the first part of the theorem.

Let  $\sigma_n$  be the smallest singular value of the positive definite kernel matrix  $K$ . Since  $Q = \text{diag}(\mathbf{y})K\text{diag}(\mathbf{y})$  and  $y_i \in \{1, -1\}$  for all  $i$ ,  $Q$  and  $K$  have identical singular values. Suppose we write  $\bar{\boldsymbol{\alpha}} = \boldsymbol{\alpha}^* + \Delta\boldsymbol{\alpha}$ ,

$$f(\bar{\boldsymbol{\alpha}}) = f(\boldsymbol{\alpha}^*) + (\boldsymbol{\alpha}^*)^T Q \Delta\boldsymbol{\alpha} + \frac{1}{2} (\Delta\boldsymbol{\alpha})^T Q \Delta\boldsymbol{\alpha} - e^T \Delta\boldsymbol{\alpha}. \quad (11)$$

The optimality condition for (1) is

$$\nabla_i f(\boldsymbol{\alpha}^*) \begin{cases} = 0 & \text{if } 0 < \alpha_i^* < C, \\ \geq 0 & \text{if } \alpha_i^* = 0, \\ \leq 0 & \text{if } \alpha_i^* = C, \end{cases} \quad (12)$$

where  $\nabla f(\boldsymbol{\alpha}^*) = Q\boldsymbol{\alpha}^* - e$ . Since  $\bar{\boldsymbol{\alpha}}$  is a feasible solution, it is easy to see that  $(\Delta\boldsymbol{\alpha})_i \geq 0$  if  $\alpha_i^* = 0$ , and  $(\Delta\boldsymbol{\alpha})_i \leq 0$  if  $\alpha_i^* = C$ . Thus,

$$(\Delta\boldsymbol{\alpha})^T (Q\boldsymbol{\alpha}^* - e) = \sum_{i=1}^n (\Delta\boldsymbol{\alpha})_i ((Q\boldsymbol{\alpha}^*)_i - 1) \geq 0.$$

Combining with (11) we have  $f(\bar{\boldsymbol{\alpha}}) \geq f(\boldsymbol{\alpha}^*) + \frac{1}{2} \Delta\boldsymbol{\alpha}^T Q \Delta\boldsymbol{\alpha} \geq f(\boldsymbol{\alpha}^*) + \frac{1}{2} \sigma_n \|\Delta\boldsymbol{\alpha}\|_2^2$ . Since we already know that  $f(\bar{\boldsymbol{\alpha}}) \leq f(\boldsymbol{\alpha}^*) + \frac{1}{2} C^2 D(\pi)$ , this implies  $\|\boldsymbol{\alpha}^* - \bar{\boldsymbol{\alpha}}\|_2^2 \leq C^2 D(\pi) / \sigma_n$ .  $\square$

### 8.3. Proof of Theorem 2

*Proof.* Let  $\Delta Q = Q - \bar{Q}$  and  $\Delta\boldsymbol{\alpha} = \boldsymbol{\alpha}^* - \bar{\boldsymbol{\alpha}}$ . From the optimality condition for (1) (see (12)), we know that  $\alpha_i^* = 0$  if  $(Q\boldsymbol{\alpha}^*)_i > 1$ . Since  $Q\boldsymbol{\alpha}^* = (\bar{Q} + \Delta Q)(\bar{\boldsymbol{\alpha}} + \Delta\boldsymbol{\alpha})$ , we see that

$$\begin{aligned} (Q\boldsymbol{\alpha}^*)_i &= (\bar{Q}\bar{\boldsymbol{\alpha}})_i + (\Delta Q\bar{\boldsymbol{\alpha}})_i + (Q\Delta\boldsymbol{\alpha})_i \\ &= (\bar{Q}\bar{\boldsymbol{\alpha}})_i + \sum_{j:\pi(\mathbf{x}_i) \neq \pi(\mathbf{x}_j)} y_i y_j K(\mathbf{x}_i, \mathbf{x}_j) \bar{\alpha}_j \\ &\quad + \sum_j y_i y_j K(\mathbf{x}_i, \mathbf{x}_j) (\Delta\boldsymbol{\alpha})_j \\ &\geq (\bar{Q}\bar{\boldsymbol{\alpha}})_i - CD(\pi) - K_{max} \|\Delta\boldsymbol{\alpha}\|_1 \\ &\geq (\bar{Q}\bar{\boldsymbol{\alpha}})_i - CD(\pi) \\ &\quad - \sqrt{n} K_{max} C \sqrt{D(\pi)} / \sqrt{\sigma_n} \text{ (by Theorem 1)} \\ &= (\bar{Q}\bar{\boldsymbol{\alpha}})_i - CD(\pi) \left( 1 + \frac{\sqrt{n} K_{max}}{\sqrt{\sigma_n D(\pi)}} \right). \end{aligned}$$

The condition stated in the theorem implies  $(\bar{Q}\bar{\boldsymbol{\alpha}})_i > 1 + CD(\pi) \left( 1 + \frac{\sqrt{n} K_{max}}{\sqrt{\sigma_n D(\pi)}} \right)$ , which implies  $(Q\boldsymbol{\alpha}^*)_i - 1 > 0$ , so from the optimality condition (12),  $\alpha_i^* = 0$ .  $\square$

### 8.4. Proof of Theorem 3

*Proof.* Similar to the proof in Theorem 1, we use  $\bar{f}(\boldsymbol{\alpha})$  to denote the objective function of (1) with kernel  $\bar{K}$ . Combine (10) with the fact that  $\alpha_i^* = 0 \ \forall i \notin S^*$  and  $\bar{\alpha}_i = 0 \ \forall i \notin \bar{S}$ , we have

$$\begin{aligned} \bar{f}(\boldsymbol{\alpha}^*) &\leq f(\boldsymbol{\alpha}^*) - \frac{1}{2} \sum_{i,j:\pi(\mathbf{x}_i) \neq \pi(\mathbf{x}_j) \text{ and } i,j \in S^*} (\bar{\alpha}_i \bar{\alpha}_j - \alpha_i^* \alpha_j^*) y_i y_j K(\mathbf{x}_i, \mathbf{x}_j) \\ &\leq f(\boldsymbol{\alpha}^*) + \frac{1}{2} C^2 D(\{\mathbf{x}_i\}_{i \in S^* \cup \bar{S}}, \pi). \end{aligned}$$

The second part of the proof is exactly the same as the second part of Theorem 1.  $\square$

### 8.5. Clustering time vs Training time

Our DC-SVM algorithm is composed of two important parts: clustering and SVM training. In Table 5 we list the time taken by each part; we can see that the clustering time is almost constant at each level, while the rest of the training time keeps increasing.

Table 5: Run time (in seconds) for DC-SVM on different levels (covtype dataset). We can see the clustering time is only a small portion compared with the total training time.

| Level      | 4      | 3      | 2       | 1       | 0       |
|------------|--------|--------|---------|---------|---------|
| Clustering | 43.2s  | 42.5s  | 40.8s   | 38.1s   | 36.5s   |
| Training   | 159.4s | 439.7s | 1422.8s | 3135.5s | 7614.0s |

### 8.6. Comparison with Bagging Approach

Bootstrap aggregating (bagging) is a machine learning approach designed to improve the stability of machine learning algorithms. Given a training set with  $n$  samples, bagging generates  $k$  training sets, each by sampling  $\bar{n}$  data points uniformly from the whole dataset. Considering the case that  $\bar{n} = n/k$ , then the bagging algorithms is similar to our DCSVM (early) approach, but with the following two differences:

- Data partition: bagging uses random sampling while DCSVM (early) uses clustering.
- Prediction: bagging uses voting for classification task, while DCSVM (early) using the nearest model for prediction.

Under the same  $k$ , both DCSVM (early) and bagging trains the  $k$  subsets independently, so the training times are identical for both algorithms. We compare the classification performance under various values of  $k$  in Table 6 on `ijcnn1`, `covtype`, and `webspam` datasets. The results show that DCSVM (early) is significantly better than bagging in terms of prediction accuracy.

Table 6: Prediction accuracy of DC-SVM (early) and bagging under various values of  $k$ . We can see that DCSVM (early) is significantly better than bagging.

| k   | ijcnn1        |         | covtype       |         | webspam       |         |
|-----|---------------|---------|---------------|---------|---------------|---------|
|     | DCSVM (early) | Bagging | DCSVM (early) | Bagging | DCSVM (early) | Bagging |
| 256 | 98.16%        | 91.81%  | 96.12%        | 83.41%  | 99.04%        | 95.20%  |
| 64  | 98.35%        | 95.44%  | 96.15%        | 88.54%  | 99.23%        | 97.13%  |
| 16  | 98.46%        | 98.24%  | 96.16%        | 91.81%  | 99.29%        | 98.28%  |

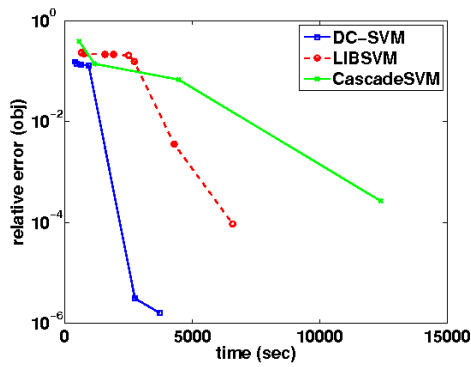

(a) kddcup99 objective function

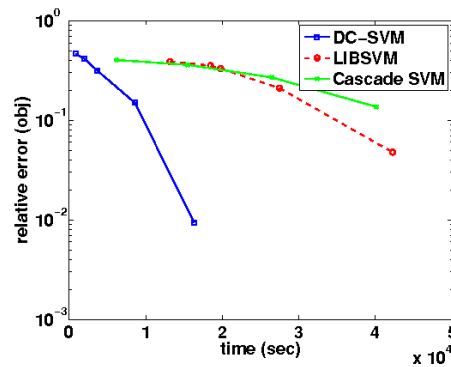

(b) cifar objective function

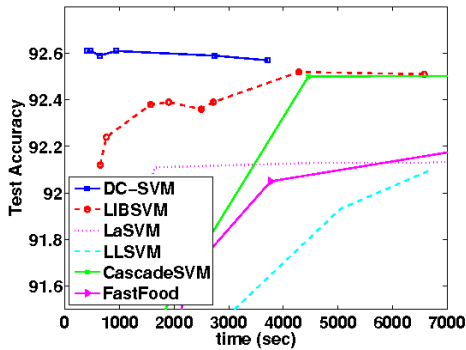

(c) kddcup99 testing accuracy

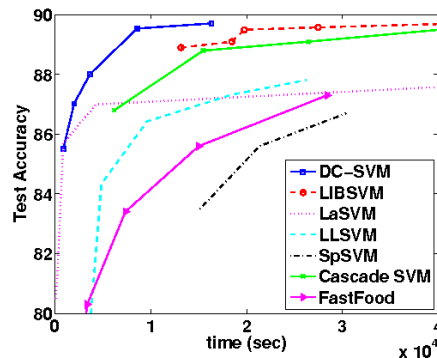

(d) cifar testing accuracy

Figure 5: Additional comparison of algorithms using RBF kernel on the kddcup99 and cifar datasets.

Table 7: Comparison of DC-SVM, DC-SVM (early), and LIBSVM on ijcnn1 with various parameters  $C, \gamma$ . DC-SVM (early) is always 10 times faster than LIBSVM achieves similar testing accuracy. DC-SVM is faster than LIBSVM for almost every setting.

| dataset | $C$       | $\gamma$  | DC-SVM (early) |              | DC-SVM      |         | LIBSVM      |         | LaSVM       |         |
|---------|-----------|-----------|----------------|--------------|-------------|---------|-------------|---------|-------------|---------|
|         |           |           | acc(%)         | time(s)      | acc(%)      | time(s) | acc(%)      | time(s) | acc(%)      | time(s) |
| ijcnn1  | $2^{-10}$ | $2^{-10}$ | <b>90.5</b>    | <b>12.8</b>  | <b>90.5</b> | 120.1   | <b>90.5</b> | 130.0   | <b>90.5</b> | 492     |
| ijcnn1  | $2^{-10}$ | $2^{-6}$  | <b>90.5</b>    | <b>12.8</b>  | <b>90.5</b> | 203.1   | <b>90.5</b> | 492.5   | <b>90.5</b> | 526     |
| ijcnn1  | $2^{-10}$ | $2^1$     | <b>90.5</b>    | <b>50.4</b>  | <b>90.5</b> | 524.2   | <b>90.5</b> | 1121.3  | <b>90.5</b> | 610     |
| ijcnn1  | $2^{-10}$ | $2^6$     | <b>93.7</b>    | <b>44.0</b>  | <b>93.7</b> | 400.2   | <b>93.7</b> | 1706.5  | 92.4        | 1139    |
| ijcnn1  | $2^{-10}$ | $2^{10}$  | <b>97.1</b>    | <b>39.1</b>  | <b>97.1</b> | 451.3   | <b>97.1</b> | 1214.7  | 95.7        | 1711    |
| ijcnn1  | $2^{-6}$  | $2^{-10}$ | <b>90.5</b>    | <b>7.2</b>   | <b>90.5</b> | 84.7    | <b>90.5</b> | 252.7   | <b>90.5</b> | 531     |
| ijcnn1  | $2^{-6}$  | $2^{-6}$  | <b>90.5</b>    | <b>7.6</b>   | <b>90.5</b> | 161.2   | <b>90.5</b> | 401.0   | <b>90.5</b> | 519     |
| ijcnn1  | $2^{-6}$  | $2^1$     | 90.7           | <b>10.8</b>  | <b>90.8</b> | 183.6   | <b>90.8</b> | 553.2   | 90.5        | 577     |
| ijcnn1  | $2^{-6}$  | $2^6$     | <b>93.9</b>    | <b>49.2</b>  | <b>93.9</b> | 416.1   | <b>93.9</b> | 1645.3  | 91.3        | 1213    |
| ijcnn1  | $2^{-6}$  | $2^{10}$  | <b>97.1</b>    | <b>40.6</b>  | <b>97.1</b> | 477.3   | <b>97.1</b> | 1100.7  | 95.5        | 1744    |
| ijcnn1  | $2^1$     | $2^{-10}$ | <b>90.5</b>    | <b>14.0</b>  | <b>90.5</b> | 305.6   | <b>90.5</b> | 424.9   | <b>90.5</b> | 511     |
| ijcnn1  | $2^1$     | $2^{-6}$  | 91.8           | <b>12.6</b>  | <b>92.0</b> | 254.6   | <b>92.0</b> | 367.1   | 90.8        | 489     |
| ijcnn1  | $2^1$     | $2^1$     | <b>98.8</b>    | <b>7.0</b>   | <b>98.8</b> | 43.5    | <b>98.8</b> | 111.6   | 95.4        | 227     |
| ijcnn1  | $2^1$     | $2^6$     | <b>98.3</b>    | <b>34.6</b>  | <b>98.3</b> | 584.5   | <b>98.3</b> | 1776.5  | 97.8        | 1085    |
| ijcnn1  | $2^1$     | $2^{10}$  | <b>97.2</b>    | <b>94.0</b>  | <b>97.2</b> | 523.1   | <b>97.2</b> | 1955.0  | 96.1        | 1691    |
| ijcnn1  | $2^6$     | $2^{-10}$ | <b>92.5</b>    | <b>27.8</b>  | 91.9        | 276.3   | 91.9        | 331.8   | 90.5        | 442     |
| ijcnn1  | $2^6$     | $2^{-6}$  | 94.8           | <b>19.9</b>  | <b>95.6</b> | 313.7   | <b>95.6</b> | 219.5   | 92.3        | 435     |
| ijcnn1  | $2^6$     | $2^1$     | <b>98.3</b>    | <b>6.4</b>   | <b>98.3</b> | 75.3    | <b>98.3</b> | 59.8    | 97.5        | 222     |
| ijcnn1  | $2^6$     | $2^6$     | <b>98.1</b>    | <b>48.3</b>  | <b>98.1</b> | 384.5   | <b>98.1</b> | 987.7   | 97.1        | 1144    |
| ijcnn1  | $2^6$     | $2^{10}$  | <b>97.2</b>    | <b>51.9</b>  | <b>97.2</b> | 530.7   | <b>97.2</b> | 1340.9  | 95.4        | 1022    |
| ijcnn1  | $2^{10}$  | $2^{-10}$ | <b>94.4</b>    | <b>146.5</b> | 92.5        | 606.1   | 92.5        | 1586.6  | 91.7        | 401     |
| ijcnn1  | $2^{10}$  | $2^{-6}$  | 97.3           | <b>124.3</b> | <b>97.6</b> | 553.6   | <b>97.6</b> | 1152.2  | 96.5        | 1075    |
| ijcnn1  | $2^{10}$  | $2^1$     | 97.5           | <b>10.6</b>  | <b>97.5</b> | 50.8    | <b>97.5</b> | 139.3   | 97.1        | 605     |
| ijcnn1  | $2^{10}$  | $2^6$     | <b>98.2</b>    | <b>42.5</b>  | <b>98.2</b> | 338.3   | <b>98.2</b> | 1629.3  | 97.1        | 890     |
| ijcnn1  | $2^{10}$  | $2^{10}$  | <b>97.2</b>    | <b>66.4</b>  | <b>97.2</b> | 309.6   | <b>97.2</b> | 2398.3  | 95.4        | 909     |

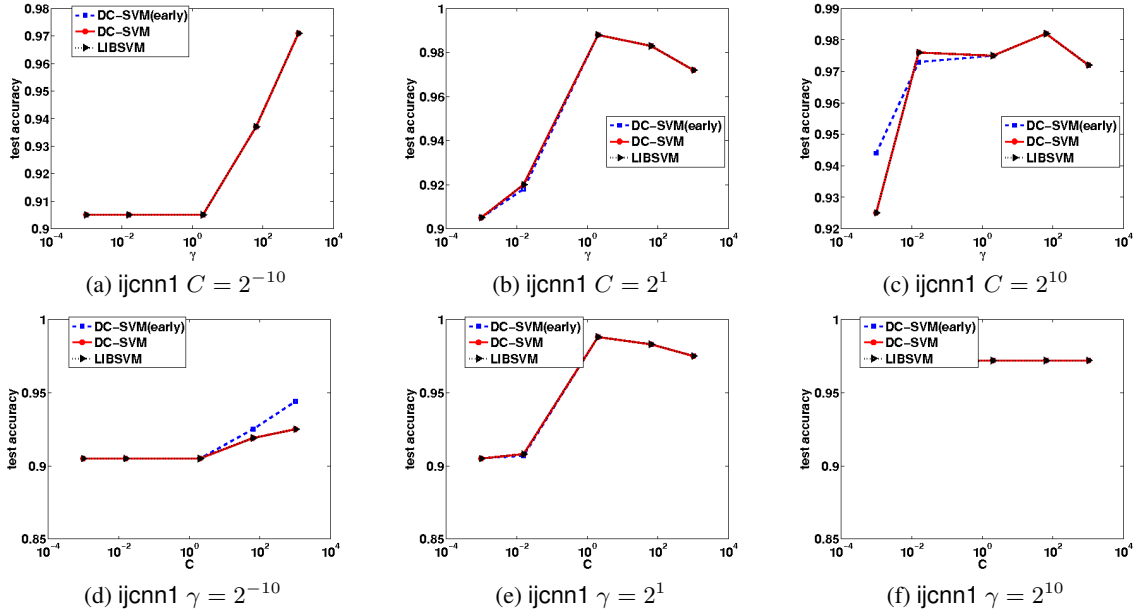

Figure 6: Robustness to the parameters  $C, \gamma$  on ijcnn1 dataset.

Table 8: Comparison of DC-SVM, DC-SVM (early) and LIBSVM on webspam with various parameters  $C, \gamma$ . DC-SVM (early) is always more than 30 times faster than LIBSVM and has comparable or better test accuracy; DC-SVM is faster than LIBSVM under all settings.

| dataset | $C$       | $\gamma$  | DC-SVM (early) |             | DC-SVM      |         | LIBSVM      |         |
|---------|-----------|-----------|----------------|-------------|-------------|---------|-------------|---------|
|         |           |           | acc(%)         | time(s)     | acc(%)      | time(s) | acc(%)      | time(s) |
| webspam | $2^{-10}$ | $2^{-10}$ | <b>86</b>      | <b>806</b>  | 61          | 26324   | 61          | 45984   |
| webspam | $2^{-10}$ | $2^{-6}$  | <b>83</b>      | <b>935</b>  | 61          | 22569   | 61          | 53569   |
| webspam | $2^{-10}$ | $2^1$     | 87.1           | <b>886</b>  | <b>91.1</b> | 10835   | <b>91.1</b> | 34226   |
| webspam | $2^{-10}$ | $2^6$     | <b>93.7</b>    | <b>1060</b> | 92.6        | 6496    | 92.6        | 34558   |
| webspam | $2^{-10}$ | $2^{10}$  | 98.3           | <b>1898</b> | <b>98.5</b> | 7410    | <b>98.5</b> | 55574   |
| webspam | $2^{-6}$  | $2^{-10}$ | <b>83</b>      | <b>793</b>  | 68          | 24542   | 68          | 44153   |
| webspam | $2^{-6}$  | $2^{-6}$  | <b>84</b>      | <b>762</b>  | 69          | 33498   | 69          | 63891   |
| webspam | $2^{-6}$  | $2^1$     | 93.3           | <b>599</b>  | <b>93.5</b> | 15098   | 93.1        | 34226   |
| webspam | $2^{-6}$  | $2^6$     | <b>96.4</b>    | <b>704</b>  | <b>96.4</b> | 7048    | <b>96.4</b> | 48571   |
| webspam | $2^{-6}$  | $2^{10}$  | 98.3           | <b>1277</b> | <b>98.6</b> | 6140    | <b>98.6</b> | 45122   |
| webspam | $2^1$     | $2^{-10}$ | <b>87</b>      | <b>688</b>  | 78          | 18741   | 78          | 48512   |
| webspam | $2^1$     | $2^{-6}$  | <b>93</b>      | <b>645</b>  | 81          | 10481   | 81          | 30106   |
| webspam | $2^1$     | $2^1$     | 98.4           | <b>420</b>  | <b>99.0</b> | 9157    | <b>99.0</b> | 35151   |
| webspam | $2^1$     | $2^6$     | <b>98.9</b>    | <b>466</b>  | <b>98.9</b> | 5104    | <b>98.9</b> | 28415   |
| webspam | $2^1$     | $2^{10}$  | 98.3           | <b>853</b>  | <b>98.7</b> | 4490    | 98.7        | 28891   |
| webspam | $2^6$     | $2^{-10}$ | <b>93</b>      | <b>759</b>  | 80          | 24849   | 80          | 64121   |
| webspam | $2^6$     | $2^{-6}$  | <b>97</b>      | <b>602</b>  | 83          | 21898   | 83          | 55414   |
| webspam | $2^6$     | $2^1$     | 98.8           | <b>406</b>  | <b>99.1</b> | 8051    | <b>99.1</b> | 40510   |
| webspam | $2^6$     | $2^6$     | <b>99.0</b>    | <b>465</b>  | 98.9        | 6140    | 98.9        | 35510   |
| webspam | $2^6$     | $2^{10}$  | 98.3           | <b>917</b>  | <b>98.7</b> | 4510    | <b>98.7</b> | 34121   |
| webspam | $2^{10}$  | $2^{-10}$ | <b>97</b>      | <b>1350</b> | 82          | 31387   | 82          | 81592   |
| webspam | $2^{10}$  | $2^{-6}$  | <b>98</b>      | <b>1127</b> | 86          | 34432   | 86          | 82581   |
| webspam | $2^{10}$  | $2^1$     | <b>98.8</b>    | <b>463</b>  | <b>98.8</b> | 10433   | <b>98.8</b> | 58512   |
| webspam | $2^{10}$  | $2^6$     | <b>99.0</b>    | <b>455</b>  | <b>99.0</b> | 15037   | <b>99.0</b> | 75121   |
| webspam | $2^{10}$  | $2^{10}$  | 98.3           | <b>831</b>  | <b>98.7</b> | 7150    | <b>98.7</b> | 59126   |

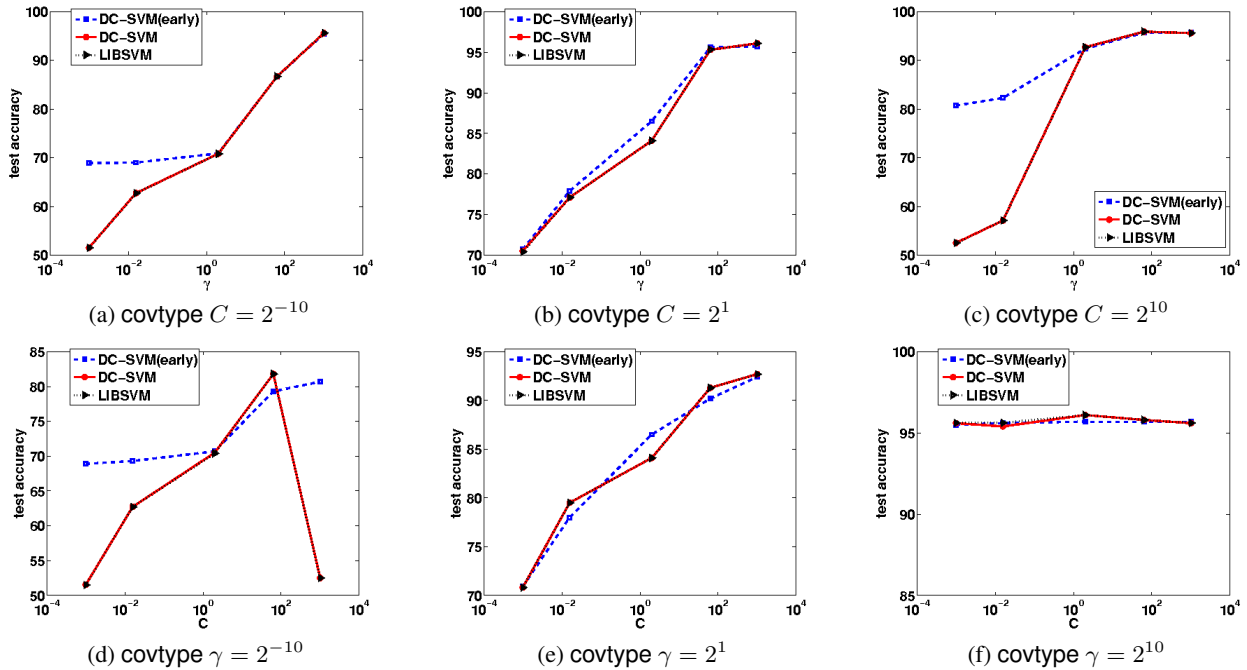

Figure 7: Robustness to the parameters  $C, \gamma$  on covtype dataset.

Table 9: Comparison of DC-SVM, DC-SVM (early) and LIBSVM on covtype with various parameters  $C, \gamma$ . DC-SVM (early) is always more than 50 times faster than LIBSVM with similar test accuracy; DC-SVM is faster than LIBSVM under all settings.

| dataset | $C$       | $\gamma$  | DC-SVM (early) |             | DC-SVM      |         | LIBSVM      |          |
|---------|-----------|-----------|----------------|-------------|-------------|---------|-------------|----------|
|         |           |           | acc(%)         | time(s)     | acc(%)      | time(s) | acc(%)      | time(s)  |
| covtype | $2^{-10}$ | $2^{-10}$ | <b>68.9</b>    | <b>736</b>  | 51.5        | 24791   | 51.5        | 48858    |
| covtype | $2^{-10}$ | $2^{-6}$  | <b>69.0</b>    | <b>507</b>  | 62.7        | 17189   | 62.7        | 62668    |
| covtype | $2^{-10}$ | $2^1$     | <b>70.9</b>    | <b>624</b>  | 70.8        | 12997   | 70.8        | 88160    |
| covtype | $2^{-10}$ | $2^6$     | <b>86.7</b>    | <b>1351</b> | <b>86.7</b> | 13985   | <b>86.7</b> | 85111    |
| covtype | $2^{-10}$ | $2^{10}$  | 95.5           | <b>1173</b> | <b>95.6</b> | 9480    | <b>95.6</b> | 54282    |
| covtype | $2^{-6}$  | $2^{-10}$ | <b>69.3</b>    | <b>373</b>  | 62.7        | 10387   | 62.7        | 90774    |
| covtype | $2^{-6}$  | $2^{-6}$  | <b>70.0</b>    | <b>625</b>  | 68.6        | 14398   | 68.6        | 76508    |
| covtype | $2^{-6}$  | $2^1$     | 78.0           | <b>346</b>  | <b>79.5</b> | 5312    | <b>79.5</b> | 77591    |
| covtype | $2^{-6}$  | $2^6$     | 87.9           | <b>895</b>  | <b>87.9</b> | 8886    | <b>87.9</b> | 120512   |
| covtype | $2^{-6}$  | $2^{10}$  | <b>95.6</b>    | <b>1238</b> | 95.4        | 7581    | 95.6        | 123396   |
| covtype | $2^1$     | $2^{-10}$ | <b>70.7</b>    | <b>433</b>  | 70.4        | 25120   | 70.4        | 88725    |
| covtype | $2^1$     | $2^{-6}$  | <b>77.9</b>    | <b>1000</b> | 77.1        | 18452   | 77.1        | 69101    |
| covtype | $2^1$     | $2^1$     | <b>86.5</b>    | <b>421</b>  | 84.1        | 11411   | 84.1        | 50890    |
| covtype | $2^1$     | $2^6$     | <b>95.6</b>    | <b>299</b>  | 95.3        | 8714    | 95.3        | 117123   |
| covtype | $2^1$     | $2^{10}$  | 95.7           | <b>882</b>  | <b>96.1</b> | 5349    |             | >300000  |
| covtype | $2^6$     | $2^{-10}$ | 79.3           | <b>1360</b> | <b>81.8</b> | 34181   | 81.8        | 105855   |
| covtype | $2^6$     | $2^{-6}$  | 81.3           | <b>2314</b> | <b>84.3</b> | 24191   | <b>84.3</b> | 108552   |
| covtype | $2^6$     | $2^1$     | 90.2           | <b>957</b>  | <b>91.3</b> | 14099   | <b>91.3</b> | 75596    |
| covtype | $2^6$     | $2^6$     | <b>96.3</b>    | <b>356</b>  | 96.2        | 9510    | 96.2        | 92951    |
| covtype | $2^6$     | $2^{10}$  | 95.7           | <b>961</b>  | <b>95.8</b> | 7483    | <b>95.8</b> | 288567   |
| covtype | $2^{10}$  | $2^{-10}$ | <b>80.7</b>    | <b>5979</b> | 52.5        | 50149   | 52.5        | 235183   |
| covtype | $2^{10}$  | $2^{-6}$  | <b>82.3</b>    | <b>8306</b> | 57.1        | 43488   |             | > 300000 |
| covtype | $2^{10}$  | $2^1$     | 92.4           | <b>4553</b> | <b>92.7</b> | 19481   | <b>92.7</b> | 254130   |
| covtype | $2^{10}$  | $2^6$     | 95.7           | <b>368</b>  | <b>95.9</b> | 12615   | <b>95.9</b> | 93231    |
| covtype | $2^{10}$  | $2^{10}$  | <b>95.7</b>    | <b>1094</b> | 95.6        | 10432   | 95.6        | 169918   |

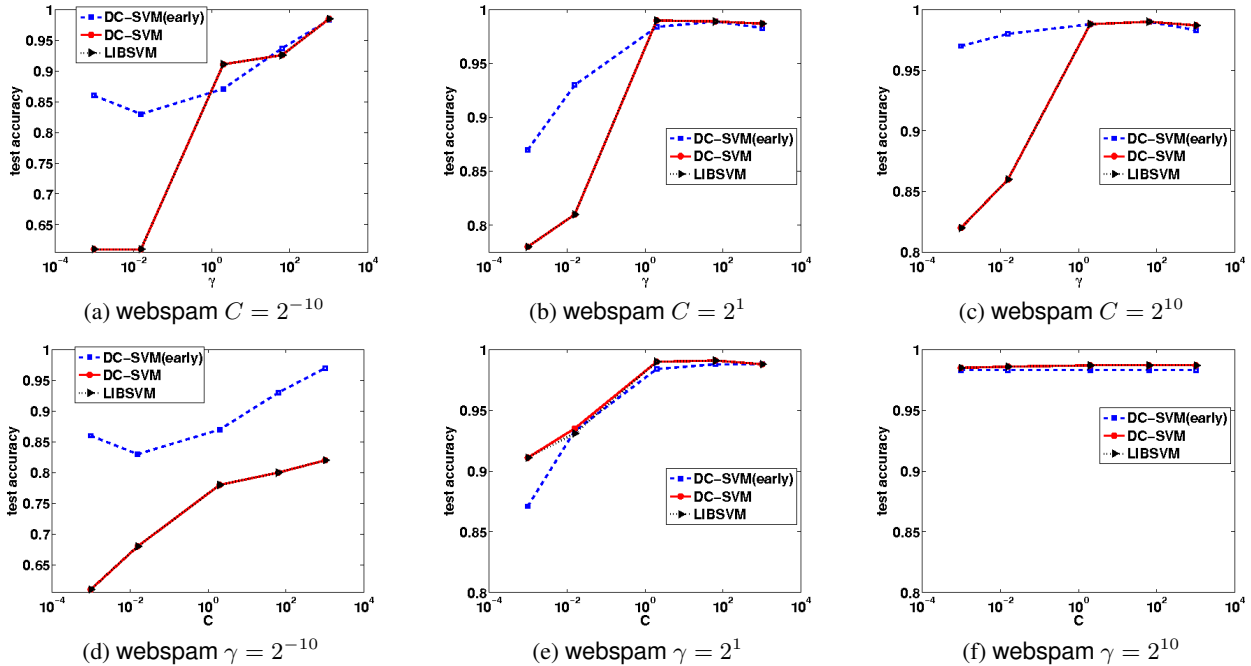

Figure 8: Robustness to the parameters  $C, \gamma$  on webspam dataset.

Table 10: Comparison of DC-SVM, DC-SVM (early) and LIBSVM on census with various parameters  $C, \gamma$ . DC-SVM (early) is always more than 50 times faster than LIBSVM with similar test accuracy; DC-SVM is faster than LIBSVM under all settings.

| dataset | $C$       | $\gamma$  | DC-SVM (early) |            | DC-SVM       |         | LIBSVM       |         |
|---------|-----------|-----------|----------------|------------|--------------|---------|--------------|---------|
|         |           |           | acc(%)         | time(s)    | acc(%)       | time(s) | acc(%)       | time(s) |
| census  | $2^{-10}$ | $2^{-10}$ | <b>93.80</b>   | <b>161</b> | <b>93.80</b> | 2153    | <b>93.80</b> | 3061    |
| census  | $2^{-10}$ | $2^{-6}$  | <b>93.80</b>   | <b>166</b> | <b>93.80</b> | 3316    | <b>93.80</b> | 5357    |
| census  | $2^{-10}$ | $2^1$     | 93.61          | <b>202</b> | <b>93.68</b> | 4215    | 93.66        | 11947   |
| census  | $2^{-10}$ | $2^6$     | 91.96          | <b>228</b> | <b>92.08</b> | 5104    | <b>92.08</b> | 12693   |
| census  | $2^{-10}$ | $2^{10}$  | <b>62.00</b>   | <b>195</b> | 56.32        | 4951    | 56.31        | 13604   |
| census  | $2^{-6}$  | $2^{-10}$ | <b>93.80</b>   | <b>145</b> | <b>93.80</b> | 3912    | <b>93.80</b> | 6693    |
| census  | $2^{-6}$  | $2^{-6}$  | <b>93.80</b>   | <b>149</b> | <b>93.80</b> | 3951    | <b>93.80</b> | 6568    |
| census  | $2^{-6}$  | $2^1$     | 93.63          | <b>217</b> | <b>93.66</b> | 4145    | <b>93.66</b> | 11945   |
| census  | $2^{-6}$  | $2^6$     | 91.97          | <b>230</b> | <b>92.10</b> | 4080    | <b>92.10</b> | 9404    |
| census  | $2^{-6}$  | $2^{10}$  | <b>62.58</b>   | <b>189</b> | 56.32        | 3069    | 56.31        | 9078    |
| census  | $2^1$     | $2^{-10}$ | 93.80          | <b>148</b> | <b>93.95</b> | 2057    | <b>93.95</b> | 1908    |
| census  | $2^1$     | $2^{-6}$  | 94.55          | <b>139</b> | <b>94.82</b> | 2018    | <b>94.82</b> | 1998    |
| census  | $2^1$     | $2^1$     | 93.27          | <b>179</b> | <b>93.36</b> | 4031    | <b>93.36</b> | 37023   |
| census  | $2^1$     | $2^6$     | 91.96          | <b>220</b> | <b>92.06</b> | 6148    | <b>92.06</b> | 33058   |
| census  | $2^1$     | $2^{10}$  | <b>62.78</b>   | <b>184</b> | 56.31        | 6541    | 56.31        | 35031   |
| census  | $2^6$     | $2^{-10}$ | <b>94.66</b>   | <b>193</b> | <b>94.66</b> | 3712    | <b>94.69</b> | 3712    |
| census  | $2^6$     | $2^{-6}$  | 94.76          | <b>164</b> | <b>95.21</b> | 2015    | <b>95.21</b> | 3725    |
| census  | $2^6$     | $2^1$     | 93.10          | <b>229</b> | <b>93.15</b> | 6814    | <b>93.15</b> | 32993   |
| census  | $2^6$     | $2^6$     | 91.77          | <b>243</b> | <b>91.88</b> | 9158    | <b>91.88</b> | 34035   |
| census  | $2^6$     | $2^{10}$  | <b>62.18</b>   | <b>210</b> | 56.25        | 9514    | 56.25        | 36910   |
| census  | $2^{10}$  | $2^{-10}$ | 94.83          | <b>538</b> | 94.83        | 2751    | <b>94.85</b> | 8729    |
| census  | $2^{10}$  | $2^{-6}$  | <b>93.89</b>   | <b>315</b> | 92.94        | 3548    | 92.94        | 12735   |
| census  | $2^{10}$  | $2^1$     | 92.89          | <b>342</b> | 92.92        | 9105    | <b>92.93</b> | 52441   |
| census  | $2^{10}$  | $2^6$     | 91.64          | <b>244</b> | <b>91.81</b> | 7519    | <b>91.81</b> | 34350   |
| census  | $2^{10}$  | $2^{10}$  | <b>61.14</b>   | <b>206</b> | 56.25        | 5917    | 56.23        | 34906   |

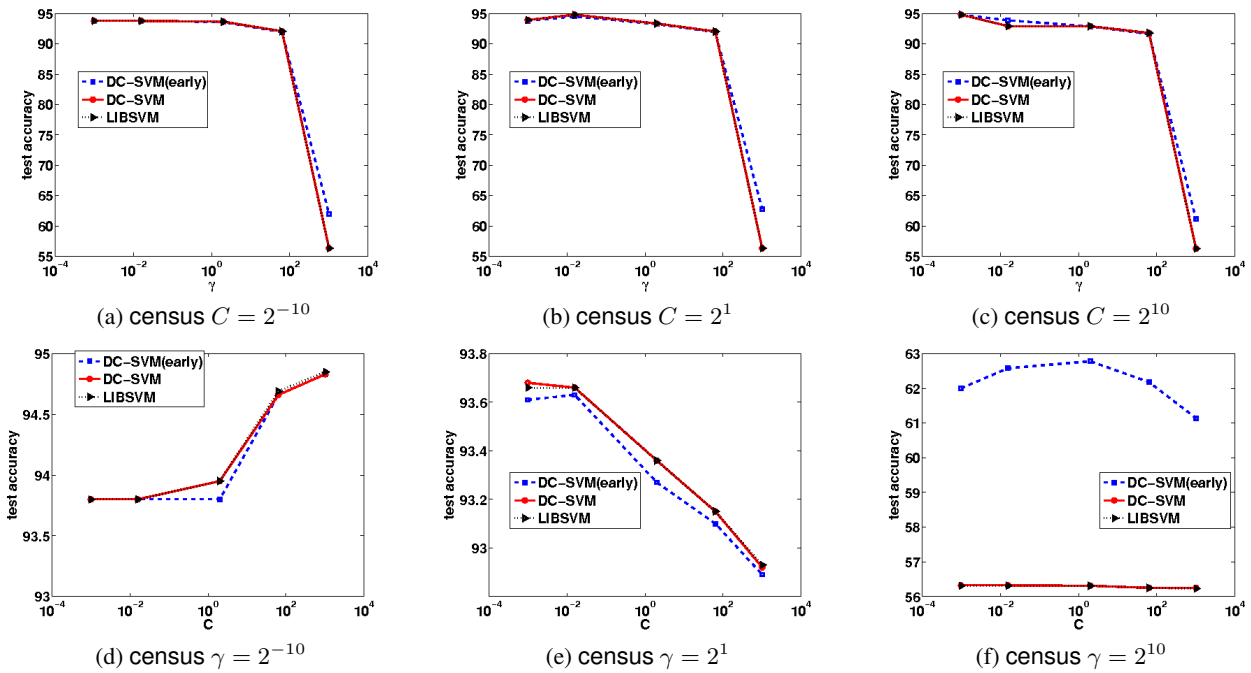

Figure 9: Robustness to the parameters  $C, \gamma$  on census dataset.
